# Supplementary material for: Design of an ultra-sensitive gold nanorod colorimetric sensor and its application based on formaldehyde reducing Ag+
Source: Royal Society of Chemistry journal article supplement (doi:10.1039/c5ra16266a), 2015-01-01
Supplement: c5ra16266a1.pdf [file c5ra16266a1.pdf]

## Electronic Supplementary Information

### Design of ultra-sensitive gold nanorods colorimetric sensor and its application based on formaldehyde reducing $\text{Ag}^+$

Jin-Mei Lin <sup>a</sup>, Yi-Qun Huang <sup>a, b</sup>, Zhen-bo Liu <sup>c</sup>, Chang-Qing Lin<sup>d</sup>, Xudong Ma<sup>b</sup>, Jia-Ming Liu <sup>a,\*</sup>

<sup>a</sup> College of Chemistry and Environmental, Minnan Normal University,

Zhangzhou, 363000, P.R. China

<sup>b</sup> Zhangzhou Affiliated Hospital of Fujian Medical University,

Zhangzhou, 363000, P.R. China

<sup>c</sup> The third Hospital of Xiamen, Xiamen, 361000, PR China

<sup>d</sup> Department of Food and Biological Engineering, Zhangzhou Institute of Technology,

Zhangzhou, 363000, P.R. China

---

\* Corresponding author: Tel.:+86 596 2591352.  
E-mail address: zzsylujiangming@163.com (J. Liu).

## Supporting Results

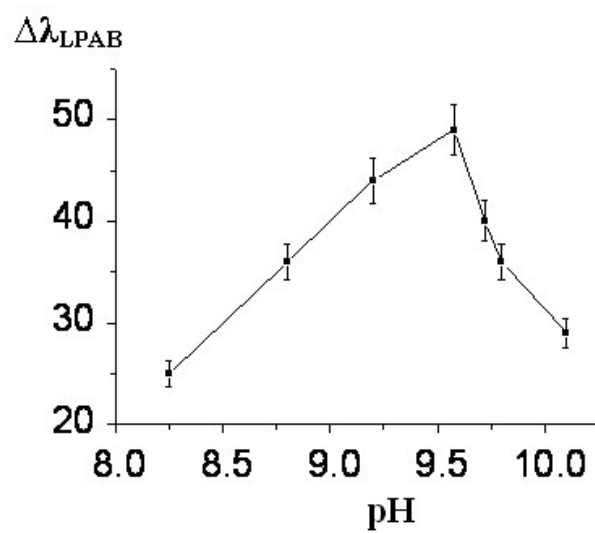

**Figure S1** Effect of pH on the  $\Delta\lambda_{\text{LPAB}}$  of the system containing 1.00 mL AuNRs, 85.0  $\mu\text{L}$  of 0.010 M  $\text{AgNO}_3$ , 1.00 mL glycine-sodium hydroxide buffer and 8.0  $\text{ng mL}^{-1}$  HCHO at 50  $^\circ\text{C}$  for 15 min.

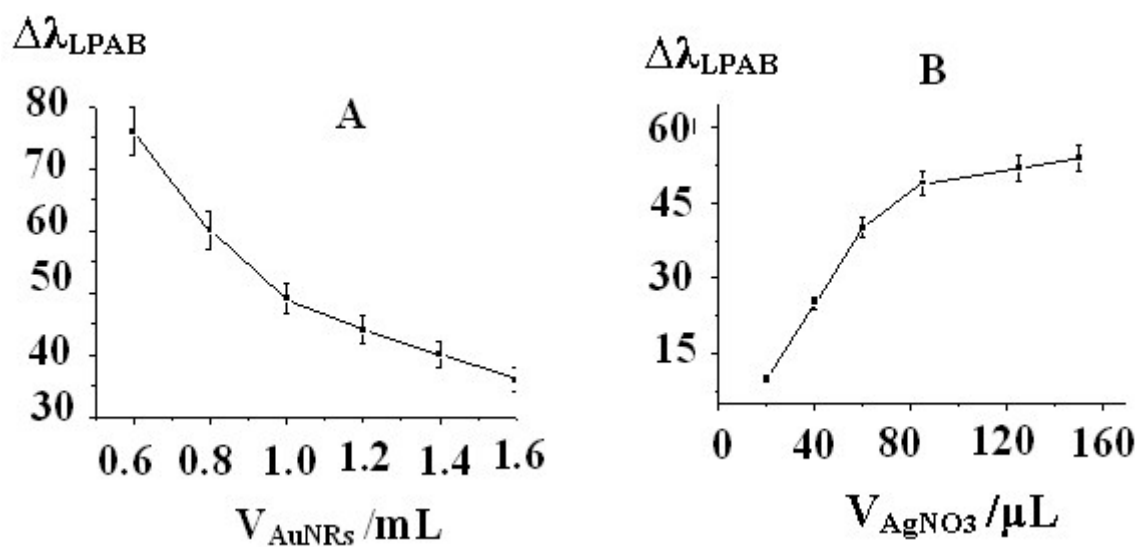

**Figure S2.** Effects of the dosage of AuNRs (A: 85.0  $\mu L$  0.01 M of AgNO<sub>3</sub>) and AgNO<sub>3</sub> (B: 1.00 mL AuNRs) on the  $\Delta\lambda_{LPAB}$  of the system containing 1.00 mL AuNRs, 85.0  $\mu L$  of 0.010 M AgNO<sub>3</sub>, 1.00 mL glycine-sodium hydroxide buffer and 8.0 ng mL<sup>-1</sup> HCHO at 50 °C for 15 min

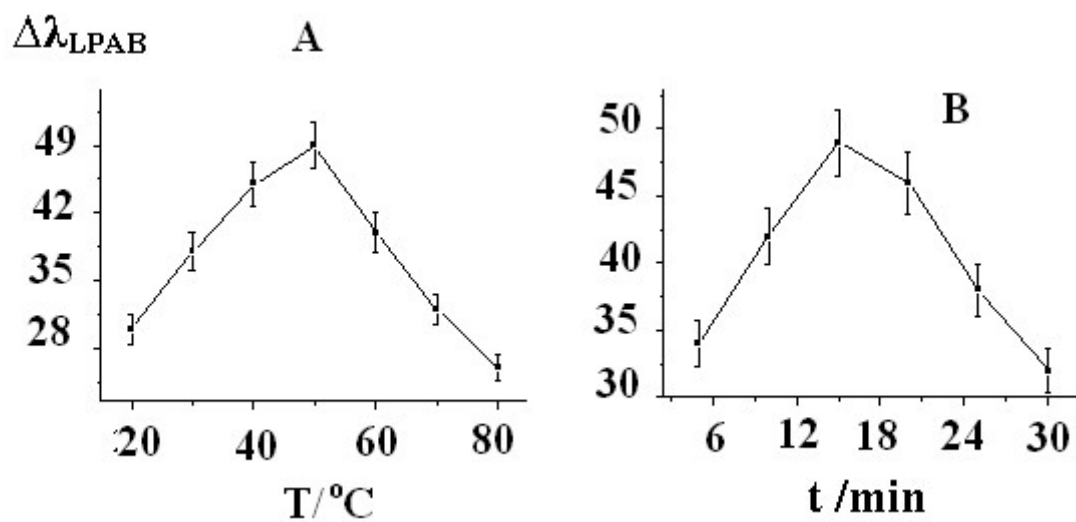

**Figure S3** Effects of reaction temperature (A, reaction time: 15 min) and time (B, reaction temperature: 50 °C) on the  $\Delta\lambda_{LPAB}$  of the system (1.00 mL AuNRs, 85.0  $\mu\text{L}$  of 0.010 M  $\text{AgNO}_3$ , 1.00 mL glycine - sodium hydroxide buffer and 8.0  $\text{ng mL}^{-1}$  HCHO. pH = 9.58).

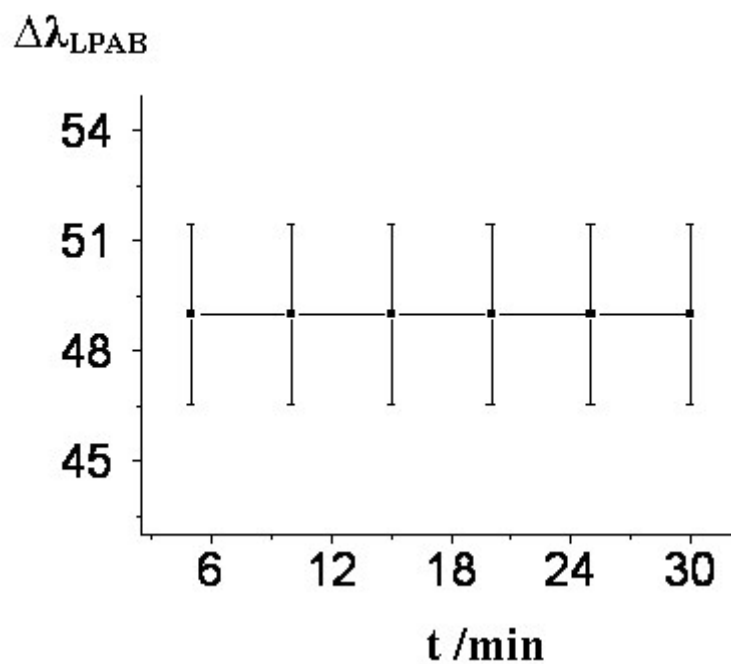

**Figure S4.** Effects of standing time on the  $\Delta\lambda_{\text{LPAB}}$  of the system (1.00 mL AuNRs, 85.0  $\mu\text{L}$  of 0.010 M  $\text{AgNO}_3$ , 1.00 mL glycine-sodium hydroxide buffer and 8.0  $\text{ng mL}^{-1}$  HCHO at 50  $^\circ\text{C}$  for 15 min. pH = 9.58)

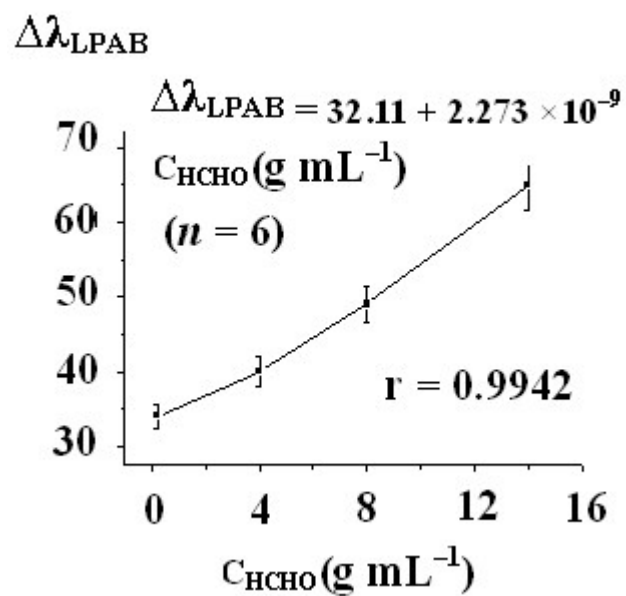

**Figure S5** The working curve of this AuNRs colorimetric sensor (When the contents of HCHO were 0, 0.20, 4.00, 8.00 and 14.00 ( $\text{ng mL}^{-1}$ ), the  $\Delta\lambda_{\text{LPAB}}$  (nm) were 34, 40, 49 and 65, the corresponding RSD (% ,  $n = 6$ ) were 4.2, 3.8, 3.4 and 3.1, respectively).

**Table S1** Effects of the co-existing substances

| AuNRs colorimetric sensor     |                   |       | References        | AuNRs colorimetric sensor    |                   |       | References        |
|-------------------------------|-------------------|-------|-------------------|------------------------------|-------------------|-------|-------------------|
|                               |                   |       | [1]               |                              |                   |       | [1]               |
| Co-existing substances        | Allowed multiples | Er(%) | Allowed multiples | Co-existing substances       | Allowed multiples | Er(%) | Allowed multiples |
| K <sup>+</sup>                | 1200              | 1.5   | 1000              | NH <sub>4</sub> <sup>+</sup> | 500               | 2.4   | 200               |
| Na <sup>+</sup>               | 1200              | -3.2  | 1000              | Mn <sup>2+</sup>             | 300               | 1.7   | 100               |
| SO <sub>4</sub> <sup>2-</sup> | 1200              | -2.6  | 1000              | Fe <sup>3+</sup>             | 100               | -2.8  | 10                |
| NO <sub>3</sub> <sup>-</sup>  | 1000              | 4.1   | 500               | Cu <sup>2+</sup>             | 100               | 3.3   | 1                 |
| Zn <sup>2+</sup>              | 1000              | 1.9   | 500               | I <sup>-</sup>               | 100               | 4.2   | 1                 |
| Mg <sup>2+</sup>              | 1000              | 3.7   | 500               | Fe <sup>3+</sup>             | 200               | 2.4   | 50                |
| F <sup>-</sup>                | 1000              | -2.8  | 500               | Co <sup>2+</sup>             | 500               | 3.6   | 200               |
| Ca <sup>2+</sup>              | 800               | 4.5   | 400               | Citric acid                  | 1500              | -4.7  | 1000              |
| Ni <sup>2+</sup>              | 800               | -1.8  | 400               | Acetone                      | 600               | 2.9   | 100               |
| Pb <sup>2+</sup>              | 800               | 2.1   | 400               | Phenol                       | 600               | 3.1   | 100               |
| Cd <sup>2+</sup>              | 800               | 3.0   | 400               | Methanol                     | 600               | -2.5  | 100               |
| Cl <sup>-</sup>               | 800               | -4.0  | 400               | Acetaldehyde                 | 200               | 3.4   | 50                |
| Al <sup>3+</sup>              | 500               | 3.9   | 200               | Oxalic acid                  | 200               | 4.0   | 50                |

Reference:[1] G. H. Tan, G. R. Li, J. Zhou, Chin. J. Spectrosc, Lab, 2010, 27, 1436-1439.
